# Supplementary material
Source: PubMed Central journal article supplement (PMC363095)

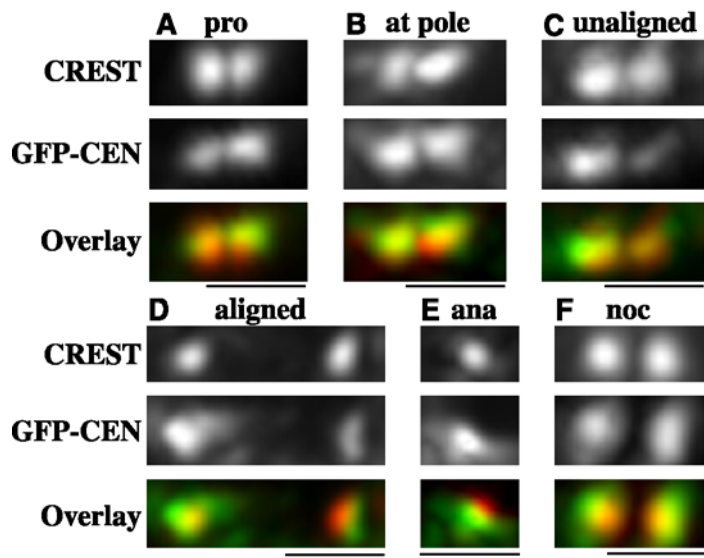

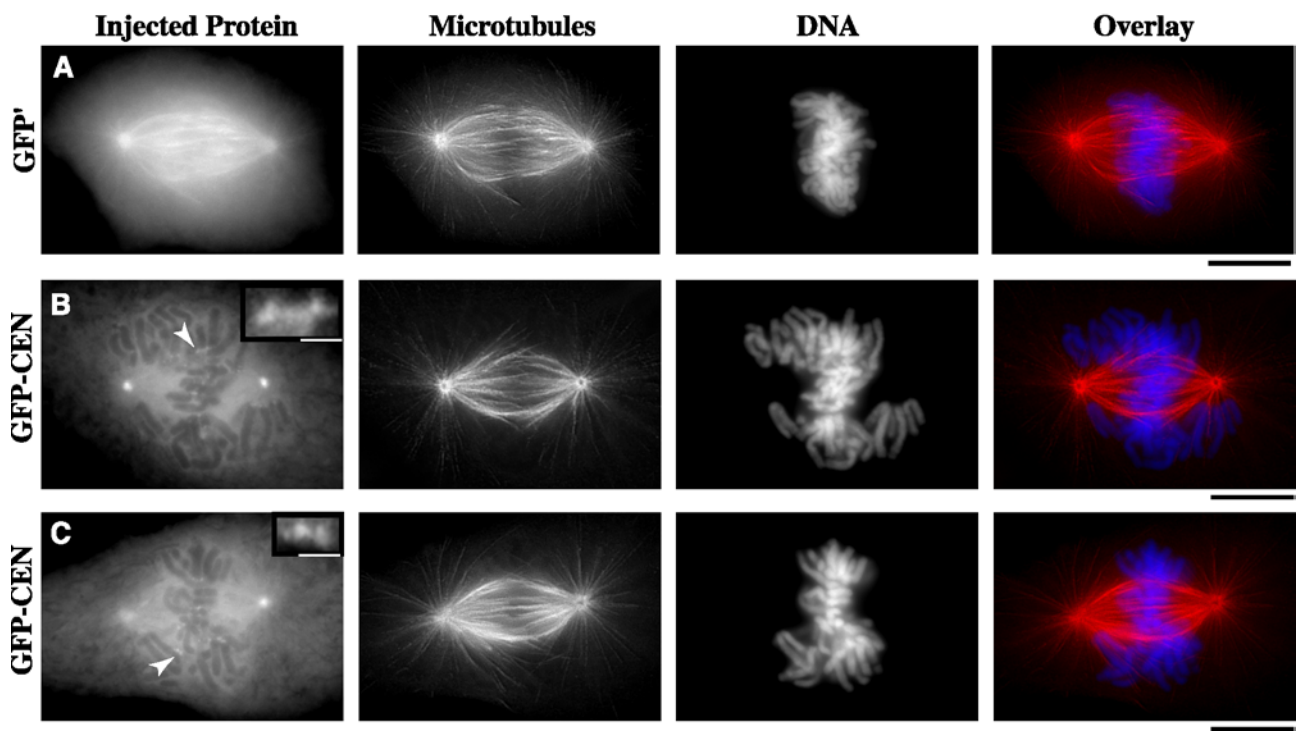

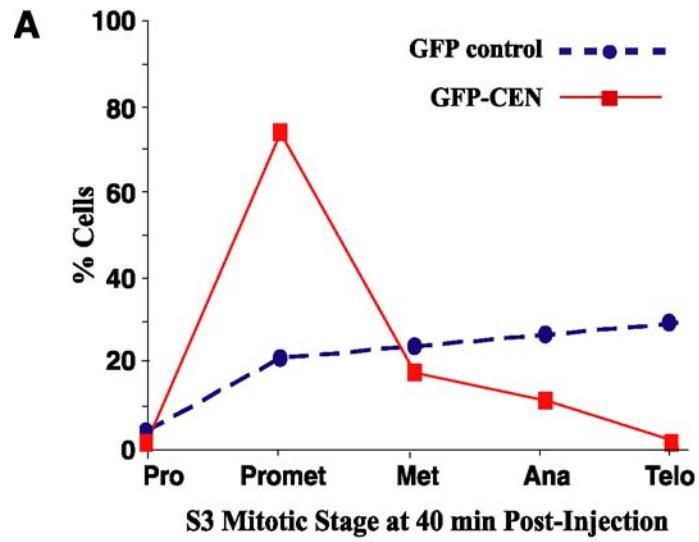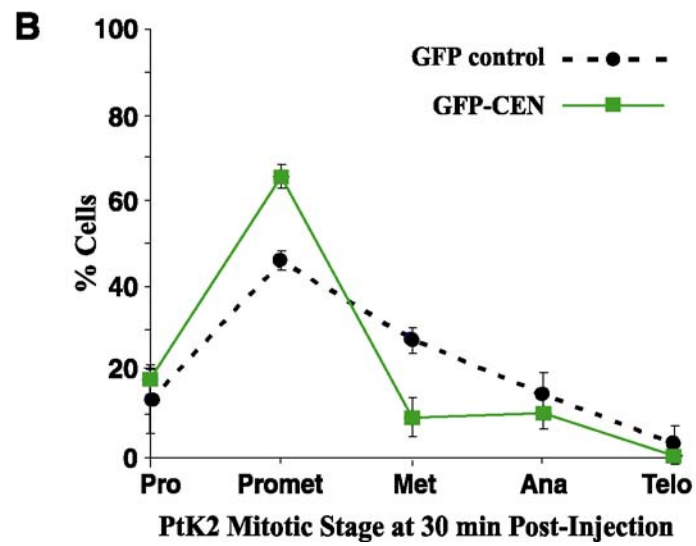

Supplement: mbc_15_3_1146__1.pdf [file mbc_15_3_1146__1.pdf]
